# Supplementary material
Source: Royal Society of Chemistry journal article supplement (doi:10.1039/d6fd00075d)
Supplement: d6fd00075d1.pdf [file d6fd00075d1.pdf]

Supplementary information

**Role of iron incorporation in the structural and chemical stability of spinel cobalt oxide under the oxygen evolution reaction conditions in neutral media**

Etsushi Tsuji,<sup>\*a</sup> Yuki Shinagawa,<sup>a</sup> Hiroyuki Okada,<sup>a,b</sup> Satoshi Suganuma<sup>a,c</sup> and Naonobu Katada<sup>a</sup>

a) Center for Research on Green Sustainable Chemistry, Tottori University, 4-101 Koyama-cho Minami, Tottori 680-8552, Japan.

b) Graduate School of Engineering, Nagoya University, Chikusa-ku, Nagoya 464-8603, Japan.

c) Institute for Catalysis, Hokkaido University, Kita21, Nishi10, Kita-ku, Sapporo 001-0021, Japan.

CONTENTS

**Figure S1:** SEM images of FCO-0, -1, and -2 before and after the OER stability test.

**Figure S2:** Mass-normalized LSV of FCO- $x$  ( $0 \leq x \leq 2$ )

**Figure S3:** Double layer capacitance and LSV of FCO-0 and -1 normalized by ECSA

**Figure S4:** Time courses of normalized current density at 1.9 V vs. RHE on FCO- $x$  ( $0 \leq x \leq 2$ )

**Figure S5:** HRTEM images of FCO-0.5, -1.5, and -2 before and after the OER stability test.

**Figure S6:** XPS spectra of Co2p of FCO-0 and -1 before and after the OER stability test.

\*e-mail: e-tsuji@tottori-u.ac.jp

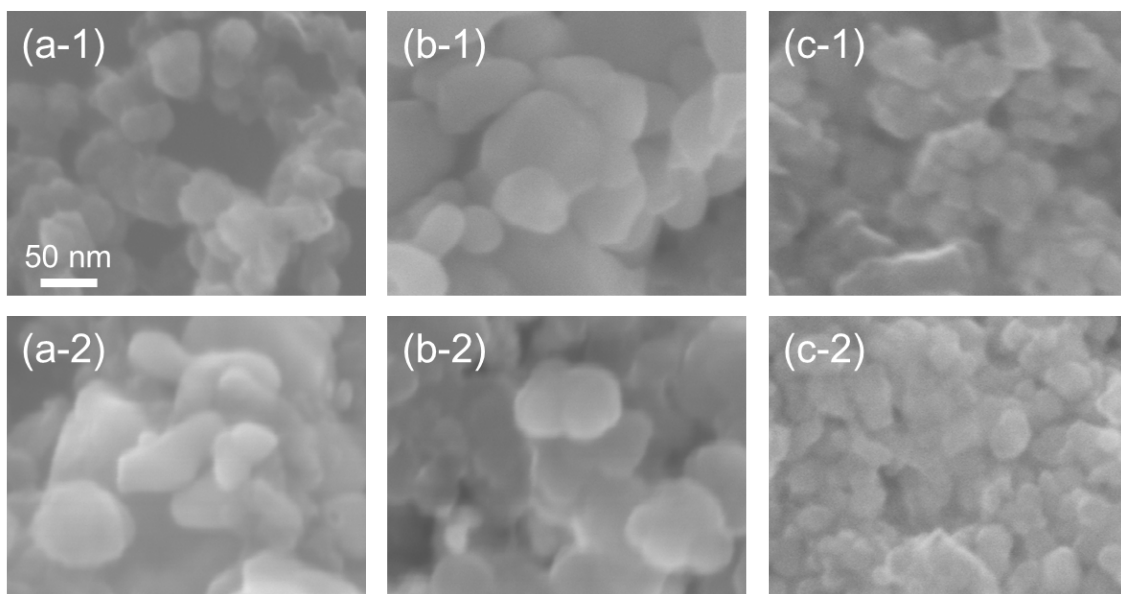

**Figure S1:** SEM images of (a) FCO-0, (b) FCO-1, and (c) FCO-2 nanoparticles (1) before and (2) after constant potential measurements at 1.9 V vs. RHE for 24 h in  $\text{NaH}_2\text{PO}_4$  and  $\text{Na}_2\text{SO}_4$  aqueous solution (pH 7).

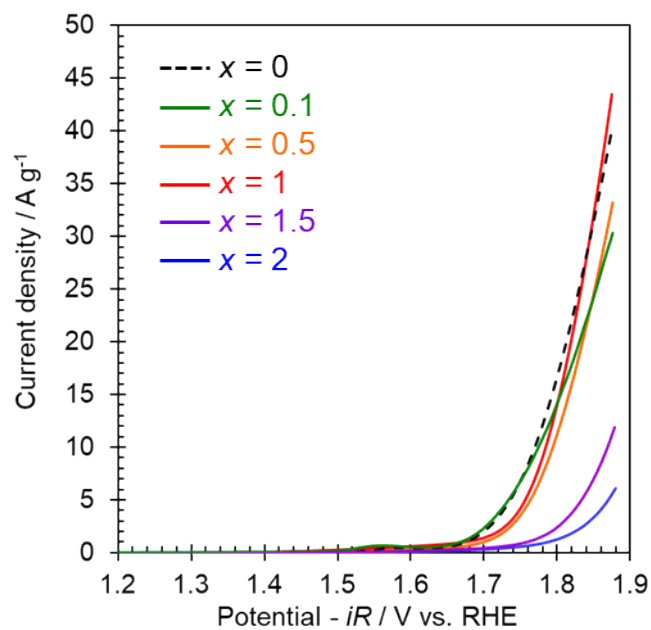

**Figure S2:** linear sweep voltammograms normalized loading amount of FCO- $x$  ( $0 \leq x \leq 2$ ) on the electrodes in  $\text{NaH}_2\text{PO}_4$  and  $\text{Na}_2\text{SO}_4$  aqueous solution (pH 7).

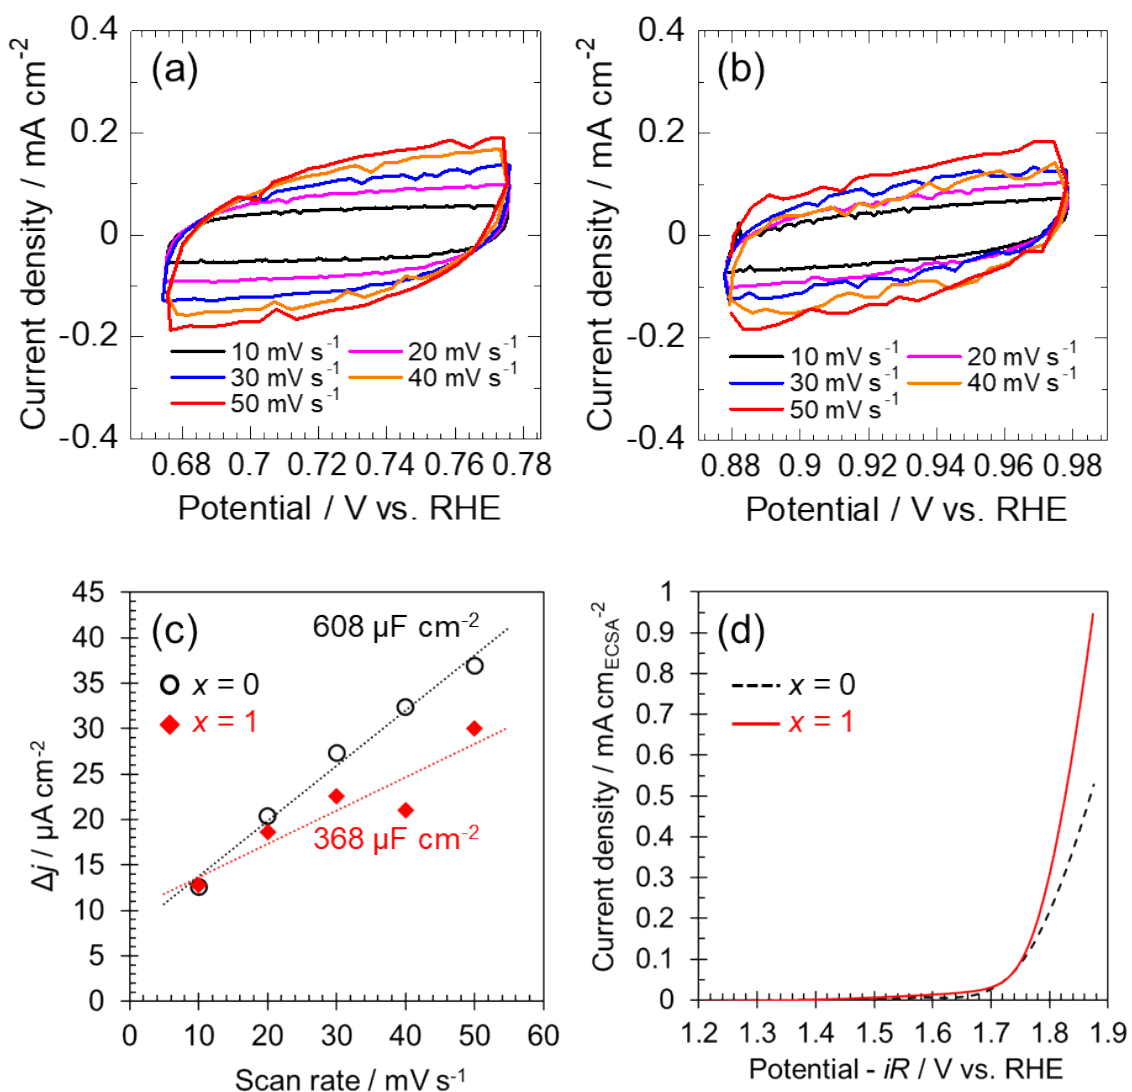

**Figure S3:** Cyclic voltammograms of (a) FCO-0 and (b) FCO-1 at the non-Faradaic regions, (c) differences between the anodic and cathodic current density ( $\Delta j = j_a - j_c$ ) in (a) and (b) plotted against the scan rate, and (d) current density of FCO-0 and FCO-1 normalized by ECSA in NaH<sub>2</sub>PO<sub>4</sub> and Na<sub>2</sub>SO<sub>4</sub> aqueous solution (pH 7). The ECSA values were calculated by dividing the double layer capacitance values evaluated from (c) by the standard specific capacitance of 40  $\mu\text{F cm}^{-2}$  based on literature.<sup>S1</sup>

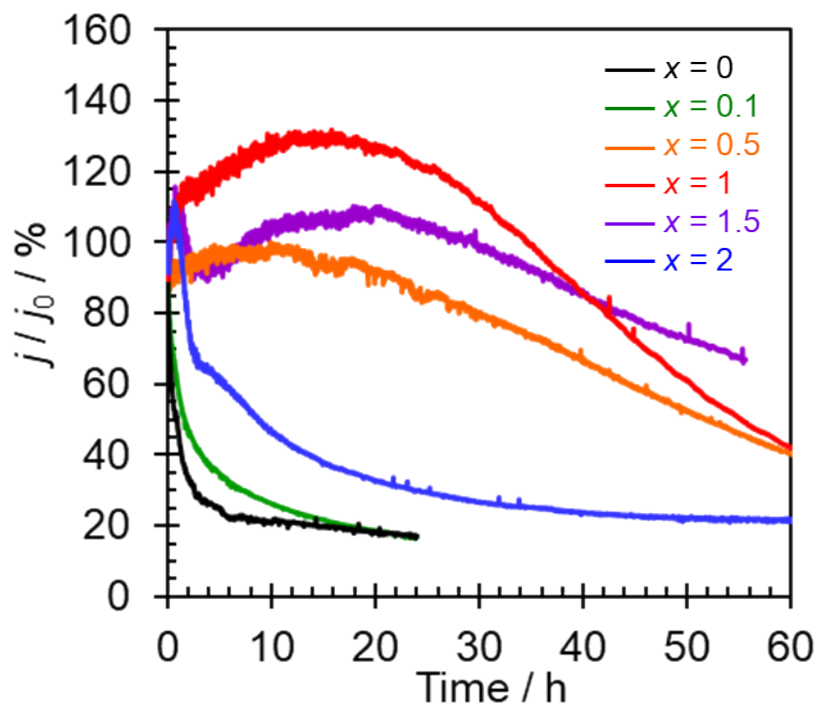

**Figure S4:** time courses of normalized current density at 1.9 V vs. RHE on FCO- $x$  ( $0 \leq x \leq 2$ ) in  $\text{NaH}_2\text{PO}_4$  and  $\text{Na}_2\text{SO}_4$  aqueous solution (pH 7). The values of current density were normalized by the respective initial values.

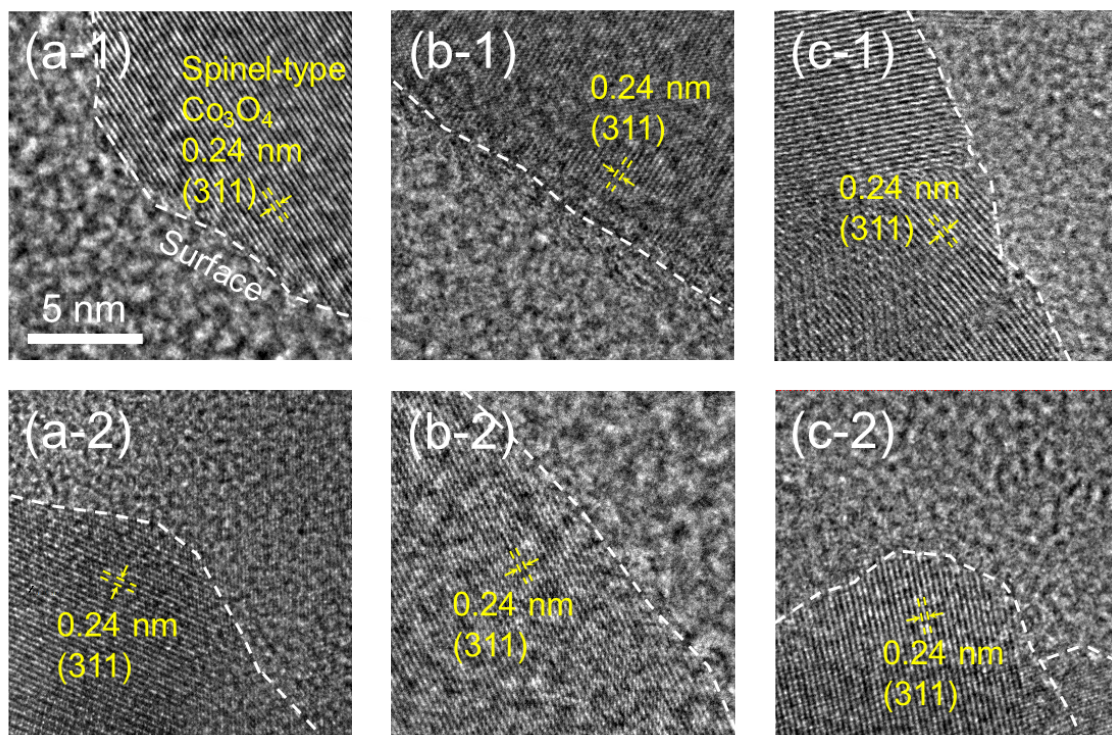

**Figure S5:** HRTEM images of (a) FCO-0.5, (b) FCO-1.5, and (c) FCO-2 electrodes (1) before and (2) after constant potential measurements at 1.9 V vs. RHE for 24 h in  $\text{NaH}_2\text{PO}_4$  and  $\text{Na}_2\text{SO}_4$  aqueous solution (pH 7).

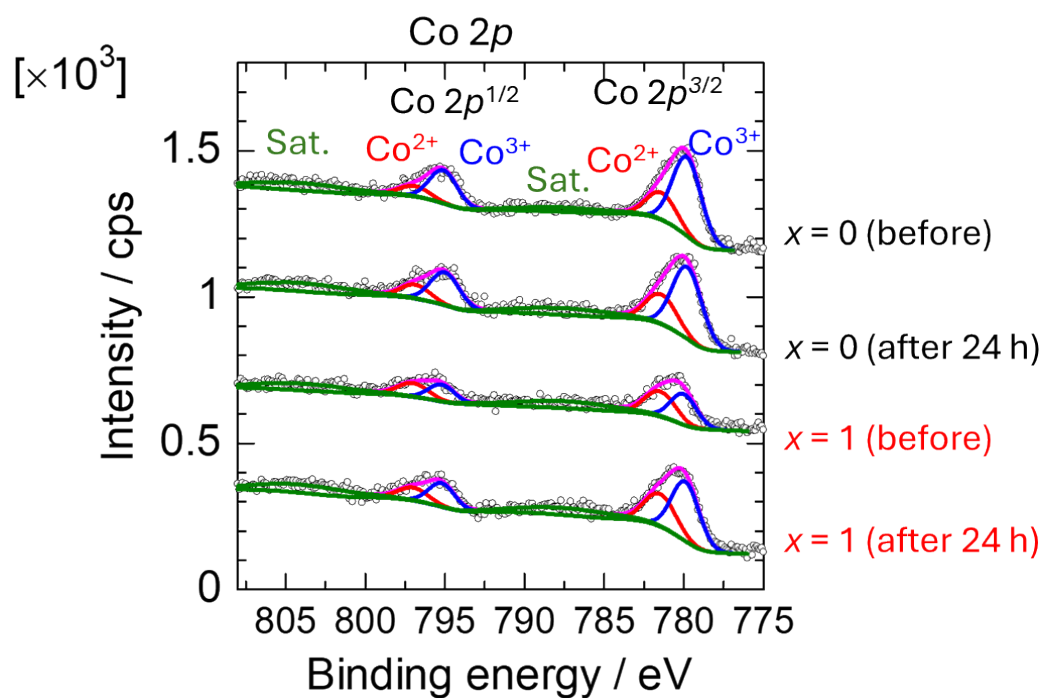

**Figure S6:** XPS spectra of Co2p of (a) FCO-0, and (b) FCO-1 (1) before and (2) after constant potential measurements at 1.9 V vs. RHE for 24 h in NaH<sub>2</sub>PO<sub>4</sub> and Na<sub>2</sub>SO<sub>4</sub> aqueous solution (pH 7).

#### Reference

[S1] K.-Li. Yan, X. Shang, Z.-Z. Liu, B. Dong, S.-S. Lu, J.-Q. Chi, W.-K. Gao, Y.-M. Chai and C.-G. Liu, *Int. J. Hydrogen Energy*, **2017**, *42*, 24150-24158.
